# Supplementary material for: Coral spawning in the Gulf of Oman and relationship to latitudinal variation in spawning season in the northwest Indian Ocean
Source: PubMed Central journal article supplement — Sci Rep. 2014 Dec 15;4:7484. doi: 10.1038/srep07484 (PMC4265778; doi:10.1038/srep07484), 2014-12-15
Supplement: srep07484-s1.pdf [file srep07484-s1.pdf]

## **Coral spawning in the Gulf of Oman and relationship to latitudinal variation in spawning season in the northwest Indian Ocean**

E.J. Howells<sup>1</sup>, D. Abrego<sup>2</sup>, G.O. Vaughan<sup>1</sup>, J.A. Burt<sup>1</sup>

<sup>1</sup>Center for Genomics and Systems Biology, New York University Abu Dhabi, PO Box 129188, Abu Dhabi, United Arab Emirates

<sup>2</sup>Department of Natural Science and Public Health, Zayed University, PO Box 144534, Abu Dhabi, United Arab Emirates

### **Supplementary Information**

Table 1. Average, minimum and maximum sea temperatures (°C) recorded annually and prior to each full moon from January 2013 to June 2014.

| <b>Annual: Start day</b>         | <b>Annual: End day</b>           | <b>Average</b> | <b>Minimum</b> | <b>Maximum</b> |
|----------------------------------|----------------------------------|----------------|----------------|----------------|
| 1 <sup>st</sup> January, 2013    | 31 <sup>st</sup> December, 2013  | 27.22          | 22.06          | 33.05          |
| <b>Monthly: Start day</b>        | <b>Monthly: End day</b>          | <b>Average</b> | <b>Minimum</b> | <b>Maximum</b> |
| 29 <sup>th</sup> December, 2012  | 27 <sup>th</sup> January, 2013   | 23.85          | 22.01          | 25.40          |
| 28 <sup>th</sup> January, 2013   | 25 <sup>th</sup> February, 2013  | 23.59          | 22.49          | 24.87          |
| 26 <sup>th</sup> February, 2013  | 27 <sup>th</sup> March, 2013     | 24.14          | 22.54          | 26.18          |
| 28 <sup>th</sup> March, 2013     | 25 <sup>th</sup> April, 2013     | 25.75          | 23.98          | 28.44          |
| 26 <sup>th</sup> April, 2013     | 25 <sup>th</sup> May, 2013       | 27.13          | 23.71          | 30.55          |
| 26 <sup>th</sup> May, 2013       | 23 <sup>rd</sup> June, 2013      | 30.38          | 26.33          | 33.05          |
| 24 <sup>th</sup> June, 2013      | 22 <sup>nd</sup> July, 2013      | 29.27          | 24.22          | 32.54          |
| 23 <sup>rd</sup> July, 2013      | 21 <sup>st</sup> August, 2013    | 28.68          | 25.70          | 31.15          |
| 22 <sup>nd</sup> August, 2013    | 19 <sup>th</sup> September, 2013 | 28.74          | 26.18          | 32.10          |
| 20 <sup>th</sup> September, 2013 | 18 <sup>th</sup> October, 2013   | 31.27          | 28.99          | 32.64          |
| 19 <sup>th</sup> October, 2013   | 17 <sup>th</sup> November, 2013  | 29.49          | 25.09          | 31.74          |
| 18 <sup>th</sup> November, 2013  | 17 <sup>th</sup> December, 2013  | 25.68          | 23.83          | 27.33          |
| 18 <sup>th</sup> December, 2013  | 16 <sup>th</sup> January, 2014   | 23.59          | 22.25          | 25.53          |
| 17 <sup>th</sup> January, 2014   | 14 <sup>th</sup> February, 2014  | 22.72          | 21.49          | 23.74          |
| 15 <sup>th</sup> February, 2014  | 16 <sup>th</sup> March, 2014     | 23.19          | 21.7           | 24.97          |
| 17 <sup>th</sup> March, 2014     | 15 <sup>th</sup> April, 2014     | 24.26          | 21.72          | 28.52          |
| 16 <sup>th</sup> April, 2014     | 14 <sup>th</sup> May, 2014       | 27.42          | 22.99          | 31.13          |
| 15 <sup>th</sup> May, 2014       | 13 <sup>th</sup> June, 2014      | 29.82          | 23.69          | 33.31          |
